# Supplementary material for: Characterization of Tissue Engineered Endothelial Cell Networks in Composite Collagen-Agarose Hydrogels
Source: PubMed Central journal article supplement (PMC7559300; doi:10.3390/gels6030027), 2020-09-03
Supplement: gels-06-00027-s001.pdf [file gels-06-00027-s001.pdf]

## Supplementary Materials for

### Characterization of tissue engineered endothelial networks in composite collagen-agarose hydrogels

Houda Ichanti, Sanja Sladic, Stefan Kalies, Axel Haverich, Birgit Andrée\* and Andres Hilfiker\*

**Table S1.** Control hydrogel construct containing Matrigel™/rCOL in serum-free medium.

| Substance              | Stock concentration | Volume per construct (µL) | Final concentration |
|------------------------|---------------------|---------------------------|---------------------|
| rCOL                   | 5 mg/mL             | 58                        | 1 mg/mL             |
| Ampuwa water           | -                   | 14                        | -                   |
| Gel medium             | -                   | 74                        | -                   |
| NaOH                   | 0.4 mM              | 12.5                      | -                   |
| Matrigel™              | 8-10 mg/mL          | 31                        | 0.8-1mg/mL          |
| Cell suspension in SFM | -                   | 185.5                     | -                   |

**Table S2.** Control hydrogel construct containing hCOL in serum-free medium.

| Substance              | Stock concentration | Volume per construct (µL) | Final concentration |
|------------------------|---------------------|---------------------------|---------------------|
| hCOL                   | 3 mg/mL             | 190                       | 1.9 mg/mL           |
| Ampuwa water           | -                   | 14                        | -                   |
| SF gel medium          | -                   | 74                        | -                   |
| NaOH                   | 0.4 mM              | 20                        | -                   |
| Cell suspension in SFM | -                   | 77                        | -                   |

**Table S1:** Hydrogel construct containing Matrigel™ and a high concentration of rCOL in serum-free medium.

| Substance              | Stock concentration | Volume per construct (µL) | Final concentration |
|------------------------|---------------------|---------------------------|---------------------|
| rCOL                   | 8.34 mg/mL          | 109                       | 3 mg/mL             |
| Ampuwa water           | -                   | 14                        | -                   |
| SF gel medium          | -                   | 74                        | -                   |
| NaOH                   | 0.4 mM              | 23.5                      | -                   |
| Matrigel™              | 8-10 mg/mL          | 31                        | 0.8-1 mg/mL         |
| Cell suspension in SFM | -                   | 52                        | -                   |

**Table S2:** Hydrogel construct containing Matrigel™/rCOL, and SeaPlaque™ agarose in serum-free medium.

| Substance              | Stock concentration | Volume per construct (µL) | Final concentration |
|------------------------|---------------------|---------------------------|---------------------|
| rCOL I                 | 5 mg/mL             | 58                        | 1 mg/mL             |
| Ampuwa water           | -                   | 14                        | -                   |
| SF gel medium          | -                   | 74                        | -                   |
| NaOH                   | 0.4 mM              | 12.5                      | -                   |
| Matrigel™              | 8-10 mg/mL          | 31                        | 0.8-1 mg/mL         |
| Cell suspension in SFM | -                   | 128.5                     | -                   |

|                    |      |    |        |
|--------------------|------|----|--------|
| SeaPlaque™ Agarose | 0.4% | 57 | 0.03 % |
|--------------------|------|----|--------|

**Table S3:** Hydrogel construct containing hCOL and SeaPlaque™ agarose in serum-free medium.

| Substance              | Stock concentration | Volume per construct (μL) | Final protein concentration |
|------------------------|---------------------|---------------------------|-----------------------------|
| hCOL                   | 5 mg/mL             | 190                       | 1 mg/mL                     |
| Ampuwa water           | -                   | 14                        | -                           |
| SF gel medium          | -                   | 74                        | -                           |
| NaOH                   | 0.4 mM              | 20                        | -                           |
| Cell suspension in SFM | -                   | 20                        | -                           |
| SeaPlaque™ Agarose     | 0.4%                | 57                        | 0.03 %                      |
